# Supplementary material for: Simulation-based model selection for dynamical systems in systems and population biology
Source: PubMed Central journal article supplement — Bioinformatics. 2009 Oct 29;26(1):104–10. doi: 10.1093/bioinformatics/btp619 (PMC2796821; doi:10.1093/bioinformatics/btp619), 2009-10-29
Supplement: btp619_1.pdf [file btp619_1.pdf]

# Supplementary figures and datasets

Tina Toni, Michael P. H. Stumpf

Table 1: Simulated dataset for the chemical reaction kinetics example.

|      |       |       |       |       |       |       |       |       |       |       |
|------|-------|-------|-------|-------|-------|-------|-------|-------|-------|-------|
| time | 0.000 | 0.005 | 0.010 | 0.015 | 0.020 | 0.025 | 0.030 | 0.035 | 0.040 | 0.045 |
| Y    | 3     | 8     | 15    | 18    | 23    | 27    | 32    | 35    | 37    | 37    |
| time | 0.050 | 0.055 | 0.060 | 0.065 | 0.070 | 0.075 | 0.080 | 0.085 | 0.090 | 0.095 |
| Y    | 38    | 39    | 40    | 41    | 41    | 42    | 42    | 42    | 42    | 42    |

Table 2: Influenza A (H3N2) infection in 1977-78 (middle column) and 1980-81 (right column) epidemics, Tecumseh, Michigan [1].

| Nr. infected individuals | 1  | 2  | 3  | 4  | 5 | 1  | 2  | 3  | 4  | 5 |
|--------------------------|----|----|----|----|---|----|----|----|----|---|
| 0                        | 66 | 87 | 25 | 22 | 4 | 44 | 62 | 47 | 38 | 9 |
| 1                        | 13 | 14 | 15 | 9  | 4 | 10 | 13 | 8  | 11 | 5 |
| 2                        |    | 4  | 4  | 9  | 1 |    | 9  | 2  | 7  | 3 |
| 3                        |    |    | 4  | 3  | 1 |    |    | 3  | 5  | 1 |
| 4                        |    |    |    | 1  | 1 |    |    |    | 1  | 0 |
| 5                        |    |    |    |    | 0 |    |    |    |    | 1 |

Table 3: Influenza B infection in 1975-76 epidemic (middle column) and influenza A (H1N1) infection in 1978-79 epidemic (right column), Seattle, Washington [2].

| Nr. infected individuals | 1 | 2  | 3  | 4 | 5 | 1  | 2  | 3 |
|--------------------------|---|----|----|---|---|----|----|---|
| 0                        | 9 | 12 | 18 | 9 | 4 | 15 | 12 | 4 |
| 1                        | 1 | 6  | 6  | 4 | 3 | 11 | 17 | 4 |
| 2                        |   | 2  | 3  | 4 | 0 |    | 21 | 4 |
| 3                        |   |    | 1  | 3 | 2 |    |    | 5 |
| 4                        |   |    |    | 0 | 0 |    |    |   |
| 5                        |   |    |    |   | 0 |    |    |   |

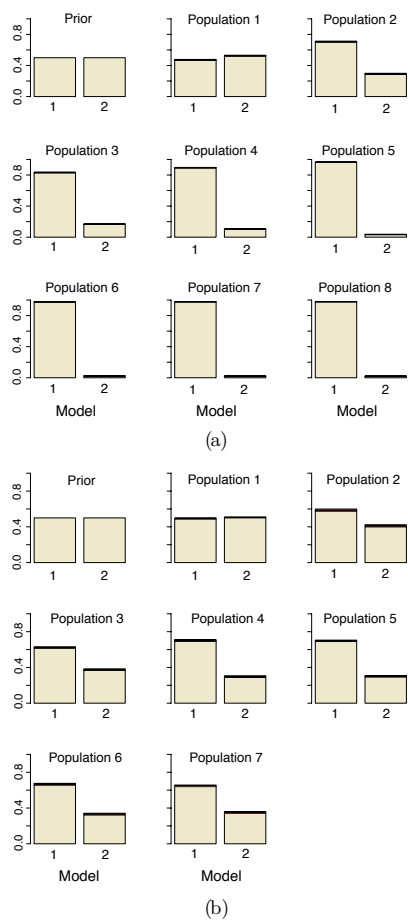

Figure 1: Estimation of marginal intermediate distributions of (a) Two- and four-parameter models (1) and data from Suppl. Table 2. Tolerance schedule:  $\epsilon = \{100, 80, 50, 30, 20, 15, 13, 12\}$ . Population 8 is the target distribution, which approximates  $P(m|D_0)$ . (b) Two- and three-parameter models (1) and data from Suppl. Table 3. Tolerance schedule:  $\epsilon = \{40, 20, 15, 10, 8, 6, 5\}$ . This tolerance schedule is lower the tolerance schedule in example (a) because the dataset used in this example is smaller. Population 7 is our target distribution. Perturbation kernels used in both examples are:  $KM_t(m|m^*) = 0.7$  if  $m = m^*$  and 0.3 otherwise;  $KP_t(\theta|\theta^*) = U(-\sigma, \sigma)$ ,  $\sigma = 0.5(\max\{\theta\}_{t-1} - \min\{\theta\}_{t-1})$ .  $N = 1000$ .  $B_t = 1$ .

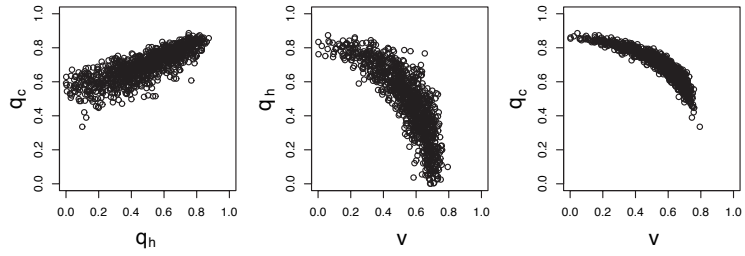

(a)

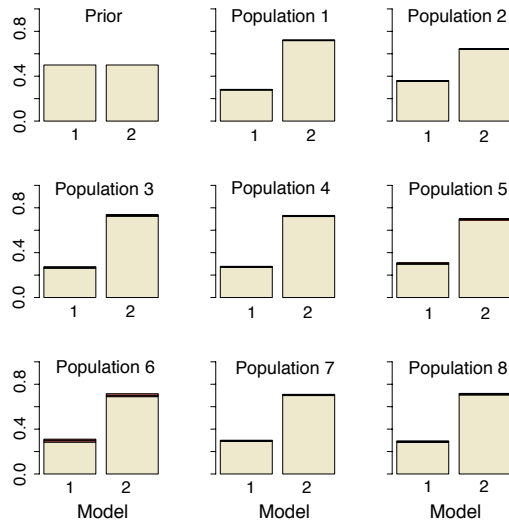

(b)

Figure 2: (a) Two dimensional projections of the posterior parameter distributions of model (2). Note the deviation from normality. (b) Estimation of marginal intermediate distributions. Population 8 the a target distribution, which approximates  $P(m|D_0)$ . Model 1 is a basic two-parameter model (1), model 2 is model (2). We use the combined data from Suppl. Table 2 and the tolerance schedule  $\epsilon = \{100, 80, 50, 30, 20, 15, 13, 12\}$ . Perturbation kernels are:  $KM_t(m|m^*) = 0.7$  if  $m = m^*$  and 0.3 otherwise;  $KP_t(\theta|\theta^*) = U(-\sigma, \sigma)$ ,  $\sigma = 0.5(\max\{\theta\}_{t-1} - \min\{\theta\}_{t-1})$ .  $N = 1000$ .  $B_t = 1$ .

## References

- [1] Addy C, Jr IL and Haber M. A generalized stochastic model for the analysis of infectious disease final size data. *Biometrics*, 961–974, 1991.
- [2] Jr IL and Koopman J. Household and community transmission parameters from final distributions of infections in households. *Biometrics*, 115–126, 1982.
